# Supplementary material
Source: bioRxiv or medRxiv preprint supplement (https://www.biorxiv.org/highwire/filestream/23330/field_highwire_adjunct_files/13/083931-7.pdf)

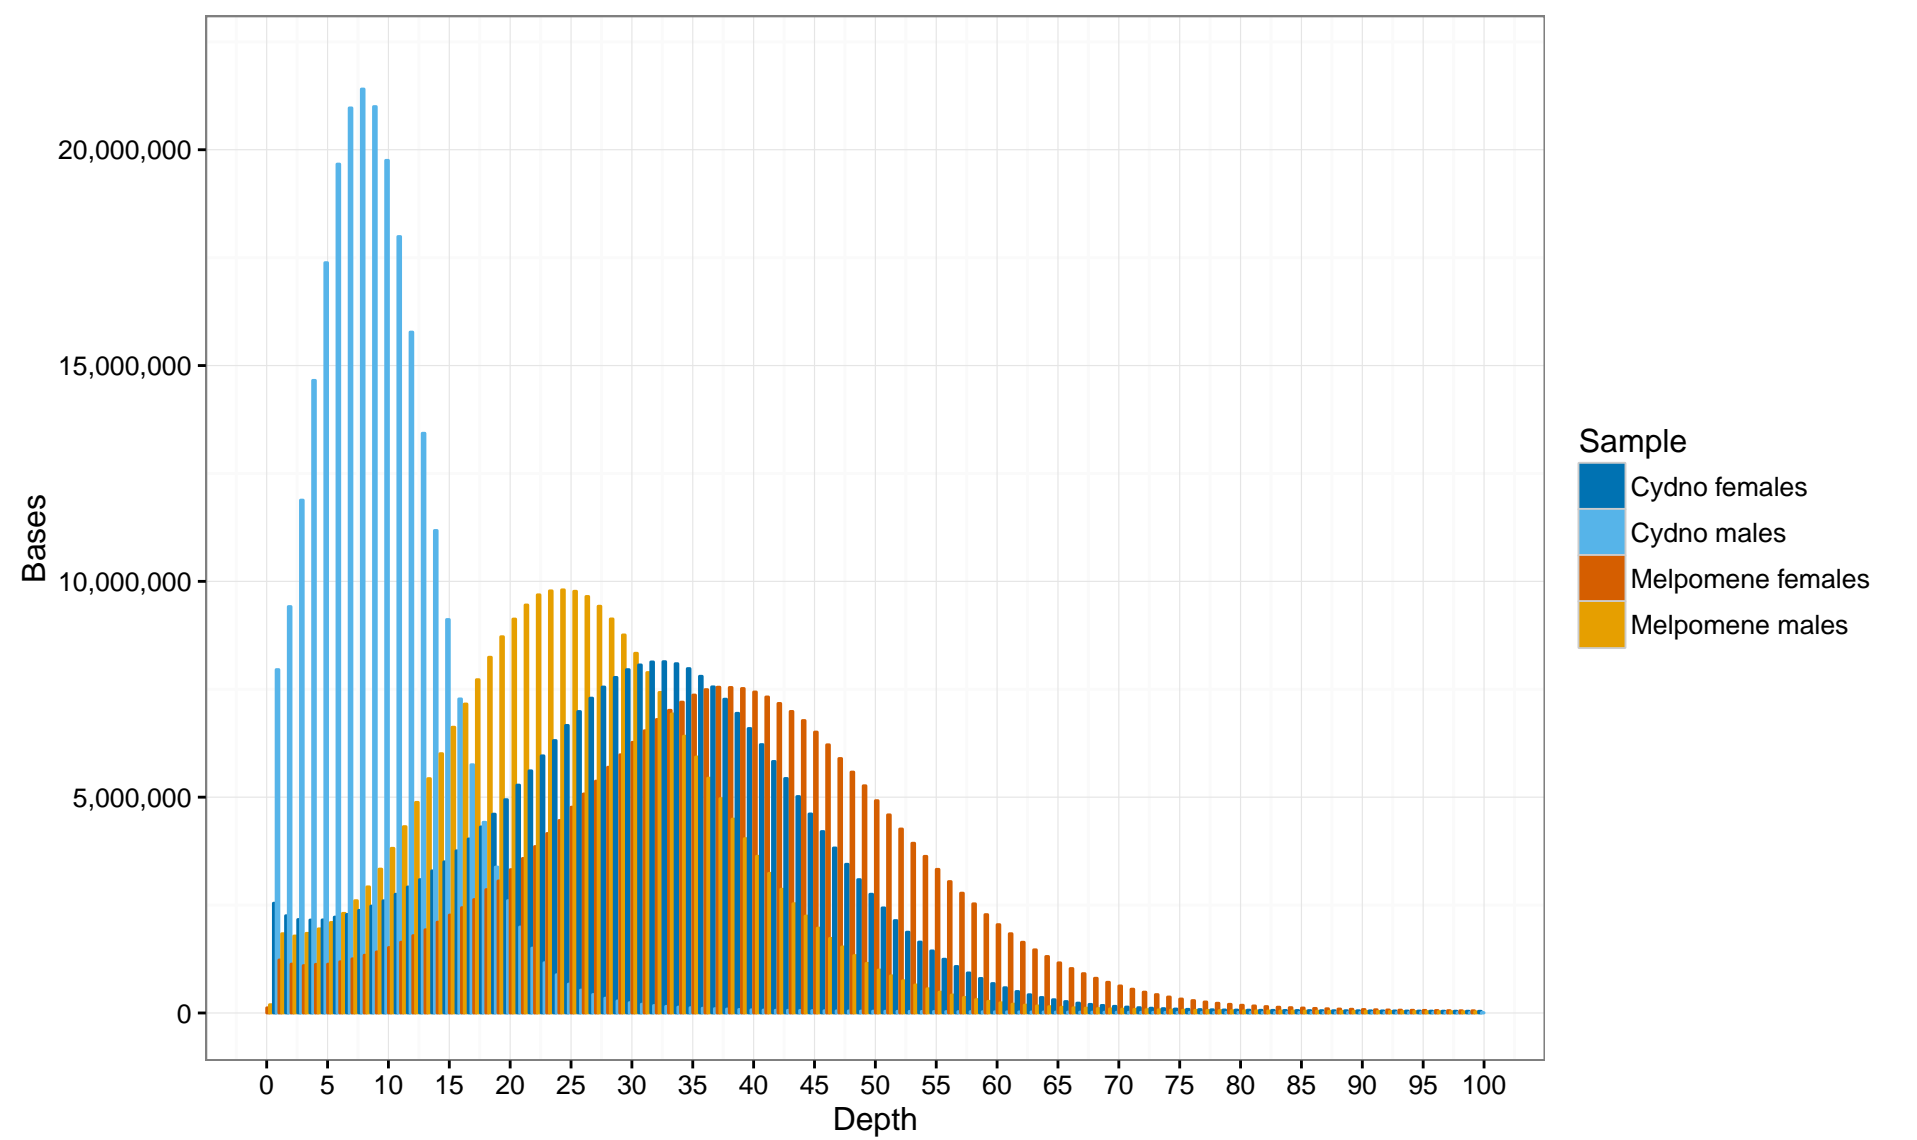

Supplement: Supplementary file [file 083931-7.pdf]
